# Supplementary material for: A Robust Silicone Rubber Strip-Based Triboelectric Nanogenerator for Vibration Energy Harvesting and Multi-Functional Self-Powered Sensing
Source: MDPI journal article supplement (doi:10.3390/nano12081248), 2022-04-07
Supplement: s1 [file s1]

Supplementary Materials

# A Robust Silicone Rubber Strip-Based Triboelectric Nanogenerator for Vibration Energy Harvesting and Multi-Functional Self-Powered Sensing

Taili Du <sup>1,2,†</sup>, Bin Ge <sup>1,†</sup>, Anaëli Elibariki Mtui <sup>1,†</sup>, Cong Zhao <sup>1</sup>, Fangyang Dong <sup>1,2</sup>, Yongjiu Zou <sup>1,2</sup>, Hao Wang <sup>1</sup>, Peiting Sun <sup>1,2,\*</sup> and Minyi Xu <sup>1,\*</sup>

<sup>1</sup> Dalian Key Lab of Marine Micro/Nano Energy and Self-Powered Systems, Marine Engineering College, Dalian Maritime University, Dalian 116026, China; dutaili@dlmu.edu.cn (T.D.); gebin@dlmu.edu.cn (B.G.); mtyellie93@gmail.com (A.E.M.); zhaocong@dlmu.edu.cn (C.Z.); dongfangyang@dlmu.edu.cn (F.D.); zouyj0421@dlmu.edu.cn (Y.Z.); hao8901@dlmu.edu.cn (H.W.)

<sup>2</sup> Collaborative Innovation Research Institute of Autonomous Ship, Dalian Maritime University, Dalian 116026, China

\* Correspondence: sunptg@dlmu.edu.cn (P.S.); xuminyi@dlmu.edu.cn (M.X.)

† These authors contribute equally to this work.

**Citation:** Du, T.; Ge, B.; Mtui, A.E.; Zhao, C.; Dong, F.; Zou, Y.; Wang, H.; Sun, P.; Xu, M. A Robust Silicone Rubber Strip-Based Triboelectric Nanogenerator for Vibration Energy Harvesting and Multi-Functional Self-Powered Sensing. *Nanomaterials* **2022**, *12*, 1248. <https://doi.org/10.3390/nano12081248>

Academic Editor: Alessia Irrera

Received: 23 February 2022

Accepted: 4 April 2022

Published: 7 April 2022

**Publisher's Note:** MDPI stays neutral with regard to jurisdictional claims in published maps and institutional affiliations.

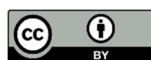

**Copyright:** © 2022 by the authors. Licensee MDPI, Basel, Switzerland. This article is an open access article distributed under the terms and conditions of the Creative Commons Attribution (CC BY) license (<https://creativecommons.org/licenses/by/4.0/>).

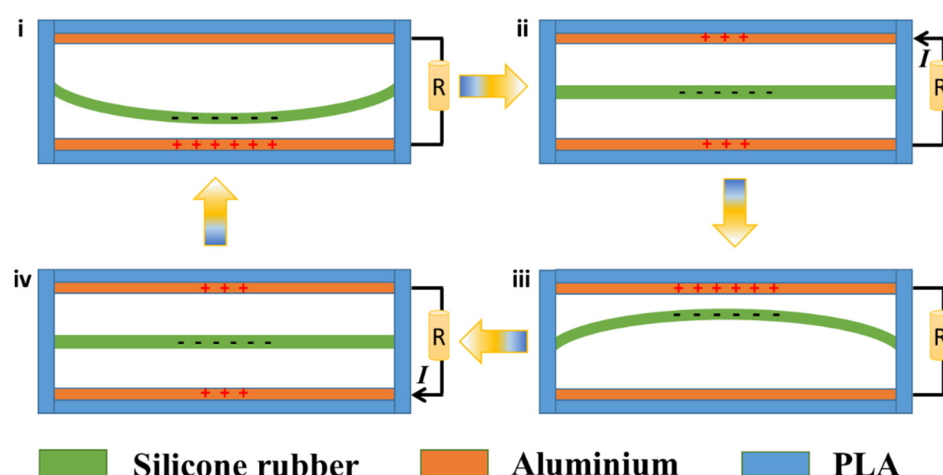

**Figure S1.** The working mechanism of the N-C model.

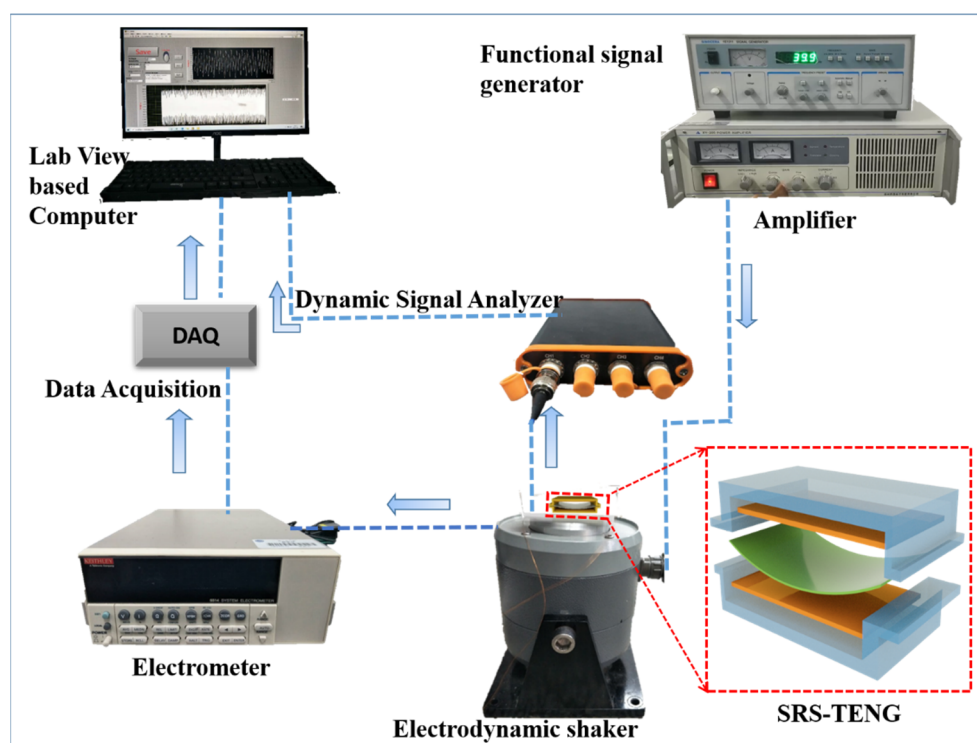

Figure S2. Testing system for SRS-TENG.

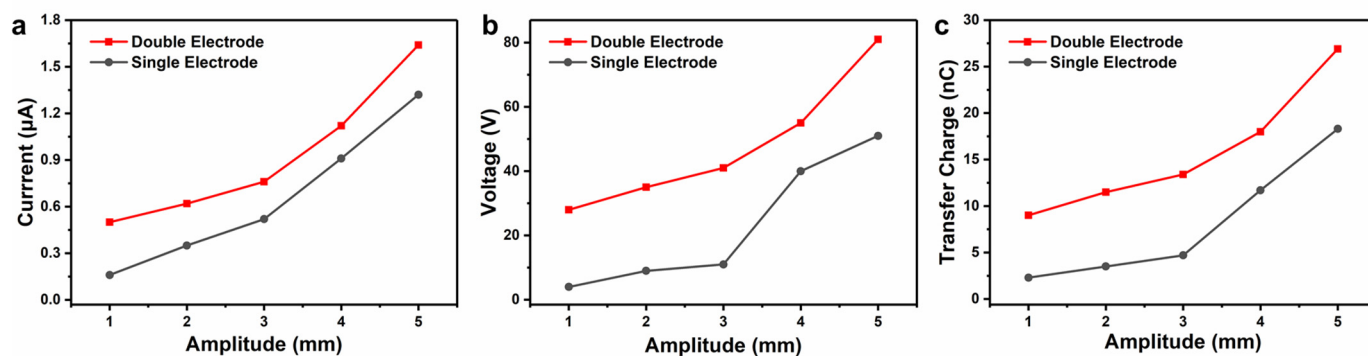

Figure S3. (a) Current, (b) voltage; (c) transfer charge performance comparison between the SRS-TENGs working at double electrode and single electrode mode.

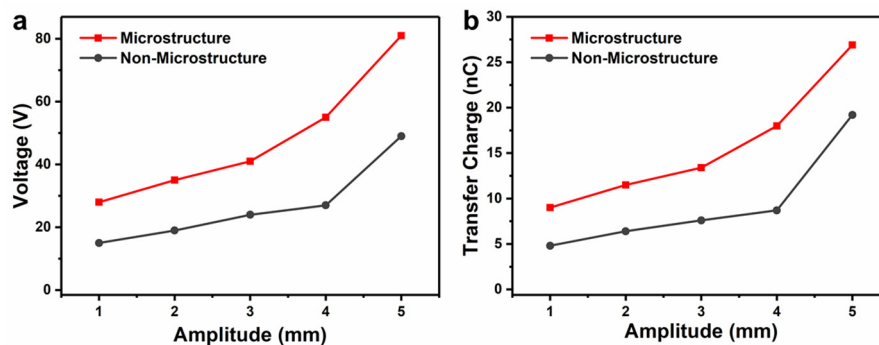

Figure S4. (a) Voltage and (b) transfer charge performance comparison between the SRS-TENGs with or without surface treatment of the strip.

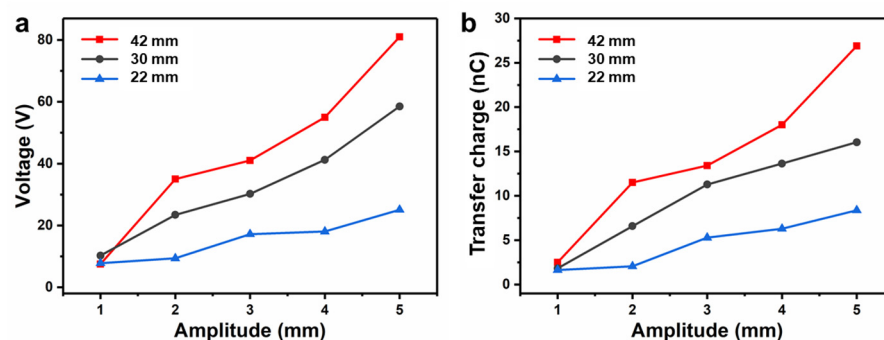

**Figure S5.** (a) Voltage and (b) transfer charge performance comparison among the SRS-TENGs with different widths of 22, 30 and 42 mm.

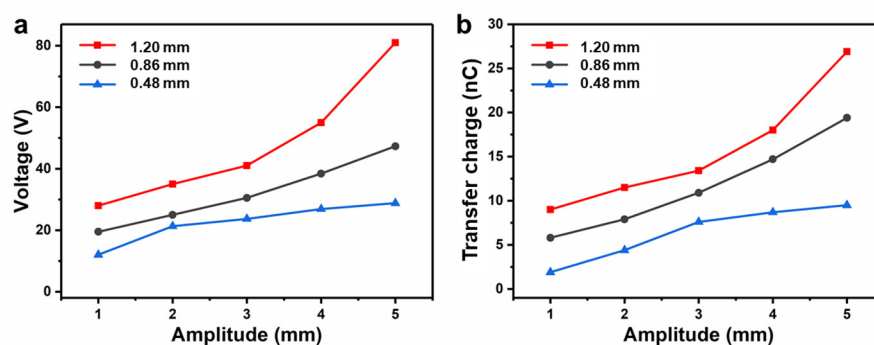

**Figure S6.** (a) Voltage and (b) transfer charge performance comparison among the SRS-TENGs with different thicknesses of 0.48, 0.86 and 1.2 mm.

**Table S1.** Spin-coater parameter setting for acquiring strip thickness.

|   | Acceleration (m/s <sup>2</sup> ) | Speed (m/s) | Time (s) | Thickness (mm) |
|---|----------------------------------|-------------|----------|----------------|
| 1 | 1000                             | 200         | 15       | 0.48           |
| 2 | 1000                             | 200         | 10       | 0.86           |
| 3 | 1000                             | 200         | 5        | 1.20           |

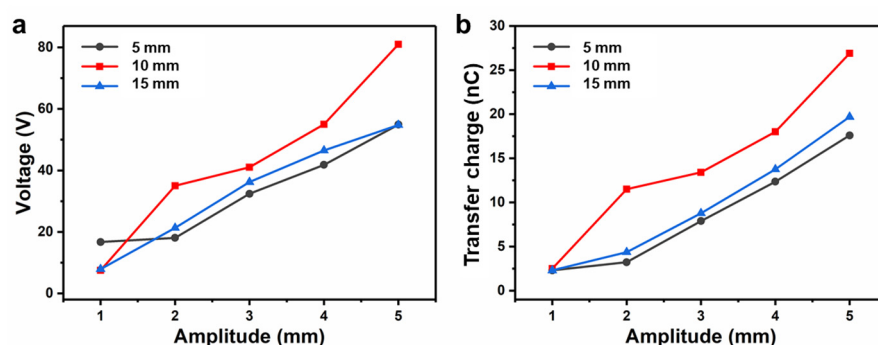

**Figure S7.** (a) Voltage and (b) transfer charge performance comparison among the SRS-TENGs with different air gaps of 5, 10 and 15 mm.

**Video S1.** Strip moving status under vibration frequencies of 10, 30 and 50 Hz with constant amplitude of 1 mm.

**Video S2.** Powering a temperature sensor by the SRS-TENG.

**Video S3.** Lighting up 112 LEDs by the SRS-TENG.

**Video S4.** Demonstration of amplitude sensing.

**Video S5.** Demonstration of vibration alarm system.
