# Supplementary material for: A Robust Silicone Rubber Strip-Based Triboelectric Nanogenerator for Vibration Energy Harvesting and Multi-Functional Self-Powered Sensing
Source: Nanomaterials (Basel). 2022 Apr 7;12(8):1248. doi: 10.3390/nano12081248 (PMC9030836; doi:10.3390/nano12081248)
Supplement: Supplementary file 1 [file nanomaterials-12-01248-s001.zip]

Archive with 6 entries (6 files):
- nanomaterials-1630271-Supplementary Materials.pdf
- Video S1  Strip moving status under vibration frequencies of 10, 30 and 50 Hz with amplitude of 1 mm..mp4
- Video S2  Powering a temperature sensor by the SRS-TENG.mp4
- Video S3 Lighting up 112 LEDs by the SRS-TENG.mp4
- Video S4  Demonstration of vibration alarm system..mp4
- Video S5  Demonstration of amplitude sensing.mp4
